# Supplementary material for: Robust jumping performance and elastic energy recovery from compliant perches in tree frogs
Source: Oxford University Press journal article supplement (doi:10.1242/jeb.121715), 2015-11-01
Supplement: jeb121715supp.pdf [file jeb121715supp.pdf]

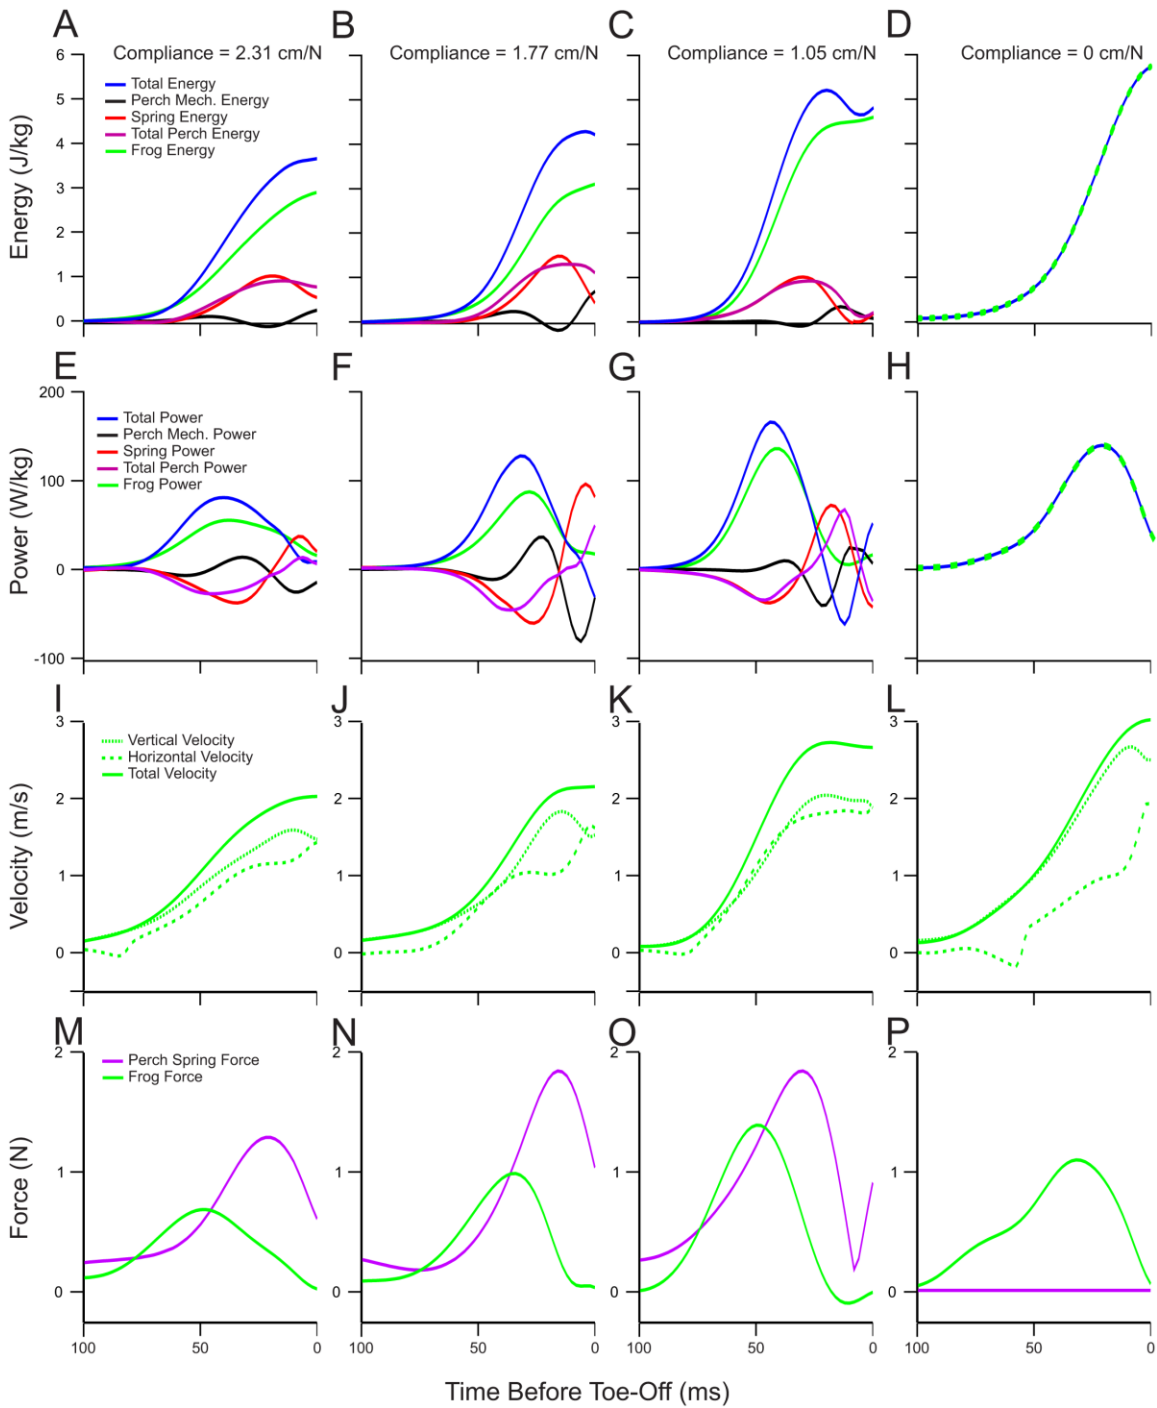

**Fig. S1.** (A-D) Energy through time in four representative jumps, normalized by total body mass. The blue line is total energy, the black line is the summed kinetic and potential energy of the perch, the red line is the spring energy, and the green line is the frog energy. A) a jump from the most compliant perch, B) a jump from the intermediate compliance perch, C) a jump from the

stiffest compliant perch, and D) a jump from the rigid perch. E-H) Power through time in four representative jumps, normalized by total body mass. The blue line is total power, the black line is the mechanical power of the perch, the red line is the spring power, and the green line is the frog power. E) a jump from the most compliant perch, F) a jump from the intermediate compliance perch, G) a jump from the stiffest compliant perch, and H) a jump from the rigid perch. I-L) Frog velocity through time in four representative jumps. The solid line is total velocity, the finely-dashed line is vertical velocity, and the coarsely-dashed line is horizontal velocity. I) a jump from the most compliant perch, J) a jump from the intermediate compliance perch, K) a jump from the stiffest compliant perch, and L) a jump from the rigid perch. M-P) Forces through time in four representative jumps. The green line is frog force, and the purple line is spring force. M) a jump from the most compliant perch, N) a jump from the intermediate compliance perch, O) a jump from the stiffest compliant perch, and P) a jump from the rigid perch.

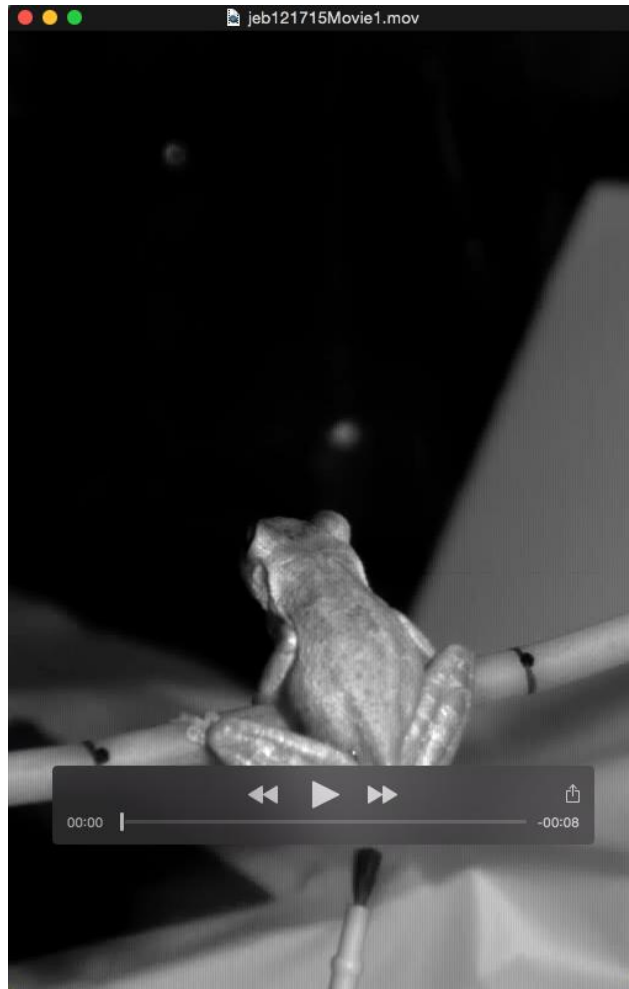

**Movie 1.** A cuban tree frog jumps from the most compliant spring – xvid codec.

Table S1. Tests for effect of compliance on variables, evaluated using a stepwise Bonferroni correction.

| Variable                                  | P value | Stepwise Bonferroni Threshold |
|-------------------------------------------|---------|-------------------------------|
| Relative Perch Displacement (leg lengths) | 0.0001* | 0.0038                        |
| Peak Perch Energy (J/kg)                  | 0.0001* | 0.0042                        |
| Perch Deflection Angle (deg.)             | 0.0001* | 0.0045                        |
| Prop. Of Perch Energy returned by Takeoff | 0.0002* | 0.0050                        |
| Frog Impulse(BW*s)                        | 0.0003* | 0.0056                        |
| Frog Energy at Takeoff (J/kg)             | 0.0053* | 0.0063                        |
| Jump Duration(ms)                         | 0.0124  | 0.0071                        |
| Jump Angle (deg.)                         | 0.0304  | 0.0083                        |
| Takeoff Velocity (m/s)                    | 0.0573  | 0.0100                        |
| Total Energy at Takeoff (J/kg)            | 0.0770  | 0.0125                        |
| Peak Frog Power (W/kg)                    | 0.0813  | 0.0167                        |
| Peak Frog Force (BW)                      | 0.1986  | 0.0250                        |
| Peak Spring Force (BW)                    | 0.3516  | 0.0500                        |
